# Supplementary material
Source: ML conference proceedings conference paper supplement (https://proceedings.mlr.press/v97/parizi19a.html)
Supplement: Supplementary file [file parizi19a-supp.pdf]

---

# Generalized Majorization-Minimization

## Supplementary Material

---

Sobhan Naderi<sup>1</sup> Kun He<sup>2</sup> Reza Aghajani<sup>3</sup> Stan Sclaroff<sup>4</sup> Pedro Felzenszwalb<sup>5</sup>

In this supplementary material we will provide proofs for the two theorems that we presented in the main paper. We also provide more visualization of the models trained with G-MM and compare them with CCCP and EM, which we had to omit from the main paper due to space limitations.

### 1. Proof of Convergence

*Proof of Theorem 1.* First, we observe that the following inequality follows from the bound construction assumptions:

$$b_t(w_t) \leq b_t(w_{t-1}) \leq v_{t-1}, \quad (14)$$

where  $v_t = b_t(w_t) - \eta d_t$ . In particular, the first inequality holds because  $w_t$  minimizes  $b_t$  and the second inequality follows from (3). Summing (14) over  $t = 1, \dots, T$  and substituting the definition of  $v_t$  gives

$$\sum_{t=1}^T b_t(w_t) \leq \sum_{t=1}^T v_{t-1} = v_0 + \sum_{t=1}^{T-1} (b_t(w_t) - \eta d_t)$$

which implies

$$\eta \sum_{t=1}^T d_t \leq v_0 - b_T(w_T). \quad (15)$$

Recall that we set  $v_0 = F(w_0)$ , and let  $F_* \in \mathbb{R}$  denote a finite global lower bound for  $F$ , and hence  $b_T(w_T) \geq F_*$ . The bound (15) then implies

$$\eta \sum_{t=1}^{\infty} d_t \leq F(w_0) - F_* < \infty,$$

which gives  $\lim_{t \rightarrow \infty} d_t = 0$ .

Next, recall that for every  $m$ -strongly convex function  $f$ , every  $x, y$  in the domain of  $f$ , and every subgradient  $g \in$

---

\* The paper was written when Kun He was at Boston University. <sup>1</sup>Google Research <sup>2</sup>Facebook Reality Labs <sup>3</sup>University of California San Diego <sup>4</sup>Boston University <sup>5</sup>Brown University. Correspondence to: Sobhan Naderi <sobhan@google.com>.

$\partial f(x)$ , we have

$$f(y) \geq f(x) + g^T(y - x) + \frac{m}{2} \|x - y\|^2. \quad (16)$$

Substituting  $f = b_t$ ,  $x = w_t$ , and  $y = w_{t-1}$  in (16), and noting that the zero vector is a subgradient of  $b_t$  at  $w_t$  (because  $w_t$  is a minimizer of  $b_t$ ), we obtain

$$\begin{aligned} \|w_t - w_{t-1}\|^2 &\leq \frac{2}{m} (b_t(w_{t-1}) - b_t(w_t)) \\ &\leq \frac{2}{m} (b_{t-1}(w_{t-1}) - b_t(w_t)), \end{aligned} \quad (17)$$

where (3) is used in the second inequality. Summing (17) over  $t = 2, \dots, T$ , we obtain

$$\begin{aligned} \sum_{t=1}^T \|w_t - w_{t-1}\|^2 &\leq b_1(w_1) - b_T(w_T) \\ &\leq F(w_1) - F_*, \end{aligned} \quad (18)$$

which implies

$$\lim_{t \rightarrow \infty} \|w_t - w_{t-1}\| = 0 \quad (19)$$

On the other hand, since  $F(w_t) \leq b_t(w_t) \leq F(w_0)$  by (2), the sequence  $\{w_t\}_t$  lies in the sublevel set  $\{w \in \mathbb{R}^n | F(w) \leq F(w_0)\}$ , which is assumed to be a compact set. To show that a sequence that is contained in a compact set converges, one needs to prove that all its converging subsequences have the same limit. For  $\{w_t\}_t$ , this follows from (19), and therefore  $\{w_t\}_t$  converges to a limit  $w^\dagger$ .  $\square$

*Proof of Theorem 2.* We prove this theorem by contradiction. Suppose  $\nabla F(w^\dagger) \neq 0$ . This implies that there exists a unit vector  $u \in \mathbb{R}^d$  such that the directional derivative of  $F$  along  $u$  is positive at  $w^\dagger$ , i.e.  $\nabla F(w^\dagger) \cdot u > 2c$  for some  $c > 0$ . Since  $F$  is continuously differentiable,  $\nabla F \cdot u$  is continuous at  $w^\dagger$ , and hence

$$\nabla F(w) \cdot u > c, \quad \forall w \in B_{2\delta}(w^\dagger), \quad (20)$$

for all small enough  $\delta > 0$ , where  $B_r(x)$  denotes an open ball around  $x$  with radius  $r$ . We fix a  $\delta > 0$  that satisfies (20), as well as the bound

$$\delta < \frac{2c}{M}. \quad (21)$$

We also fix an  $\epsilon > 0$  that satisfies

$$\epsilon < c\delta - \frac{M}{2}\delta^2, \quad (22)$$

which is possible because of (21). The reason for this will be clear shortly.

Now recall by Theorem 1 that  $w_t \rightarrow w^\dagger$  and  $d_t \rightarrow 0$ , as  $t \rightarrow \infty$ , so we can pick  $T > 0$  large enough such that

$$|w_T - w^\dagger| < \delta \quad (23)$$

and

$$d_T = b(w_T) - F(w_t) < \epsilon \quad (24)$$

Now define the function  $g$  to be the restriction of  $F$  on a line parallel to  $u$  that passes through  $w_T$  (see Figure 1), that is

$$g(z) = F(w_T + zu), \quad z \in \mathbb{R}.$$

It is easy to see that  $g$  is continuously differentiable with

$$g'(z) = \nabla F(w_T + zu) \cdot u.$$

In particular, the bound (20) implies

$$g'(z) > c, \quad z \in (0, \delta). \quad (25)$$

This is because for every  $z \in (0, \delta)$ ,

$$w_T + zu \in B_\delta(w_T) \subset B_{2\delta}(w^\dagger).$$

An application of Taylor Expansion Theorem of order  $n = 0$  on  $g$  around  $z = 0$  shows that there exists a  $z_* \in (0, \delta)$  such that

$$g(\delta) = g(0) + g'(z_*)\delta > g(0) + c\delta,$$

where we used  $g'(z_*) > c$  by (25). Substituting definitions of  $g(0)$  and  $g'(0)$  in the display above, we obtain the bound

$$F(w_*) > F(w_T) + c\delta, \quad w_* = w_T + \delta u. \quad (26)$$

On the other hand, since  $b_T$  is a smooth function with its minimum at  $w_T$  and its Hessian  $\nabla^2 b_T$  bounded by  $MI$ , second order Taylor expansion of  $b_T$  around  $w_T$  gives

$$b_T(w) \leq b_T(w_T) + \nabla b_T(w_T) \cdot (w - w_T) + \frac{M}{2} \|w - w_T\|^2,$$

and in particular, for  $w = w_* = w_T + \delta u$ ,

$$b_T(w_*) \leq b_T(w_T) + \frac{M}{2} \delta^2. \quad (27)$$

Combining the bounds (24)-(27) and the choice (22) of  $\epsilon$ , we have

$$\begin{aligned} b_T(w_*) - F(w_*) &\leq [b_T(w_T) - F(w_T)] + \frac{M}{2} \delta^2 - c\delta \\ &\leq \epsilon + \frac{M}{2} \delta^2 - c\delta \\ &< 0, \end{aligned}$$

which contradicts the fact that  $b_T$  is an upper bound for  $F$ . This completes the proof.  $\square$

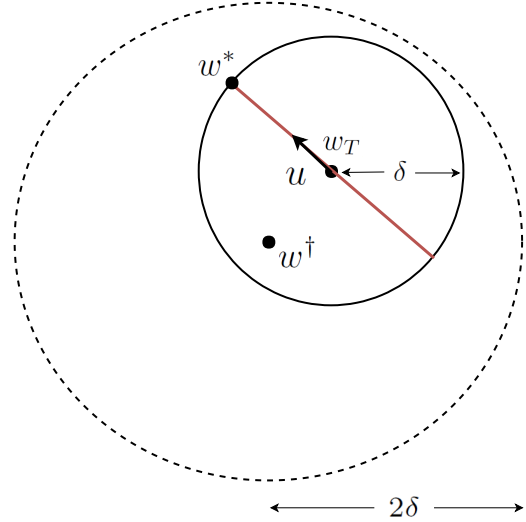

Figure 1. An illustration of quantities defined in the proof of Theorem 2

## 2. $k$ -means Clustering

Figure 2 visualizes the result of  $k$ -means and G-MM (with random bounds) on the D-31 dataset (Veenman et al., 2002), from the same initialization. G-MM finds a near perfect solution, while in standard  $k$ -means, many clusters get merged incorrectly or die off. Dead clusters are those which do not get any points assigned to them. The update rule (M-step of  $k$ -means algorithm) collapses the dead clusters on to the origin.

## 3. LS-SVM for Mammal Image Classification

We provide additional experimental results on the mammals dataset. Figure 3 shows example training images and the final imputed latent object locations by three algorithms: CCCP (red), G-MM random (blue), and G-MM biased (green). The initialization is *top-left*.

In most cases CCCP fails to update the latent locations given by initialization. The two G-MM variants, however, are able to update them significantly and often localize the objects in training images correctly. This is achieved *only* with image-level object category annotations, and with a very bad (even adversarial) initialization.

## References

Veenman, C. J., Reinders, M., and Backer, E. A maximum variance cluster algorithm. *IEEE Transactions on Pattern Analysis and Machine Intelligence (TPAMI)*, 2002.

## Generalized Majorization-Minimization

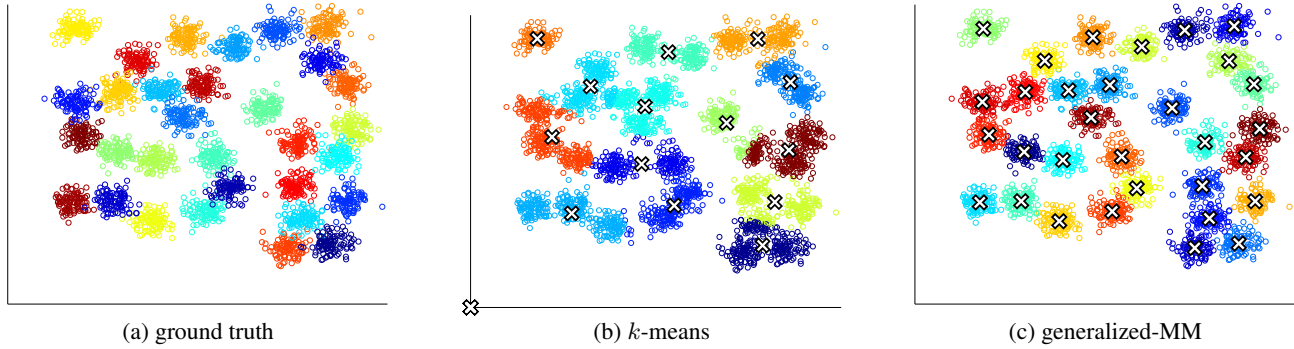

Figure 2. Visualization of clustering solutions on the D31 dataset (Veenman et al., 2002) from identical initializations. Random partition initialization scheme is used. (a) color-coded ground-truth clusters. (b) solution of  $k$ -means. (c) solution of G-MM. The white crosses indicate location of the cluster centers. Color codes match up to a permutation.

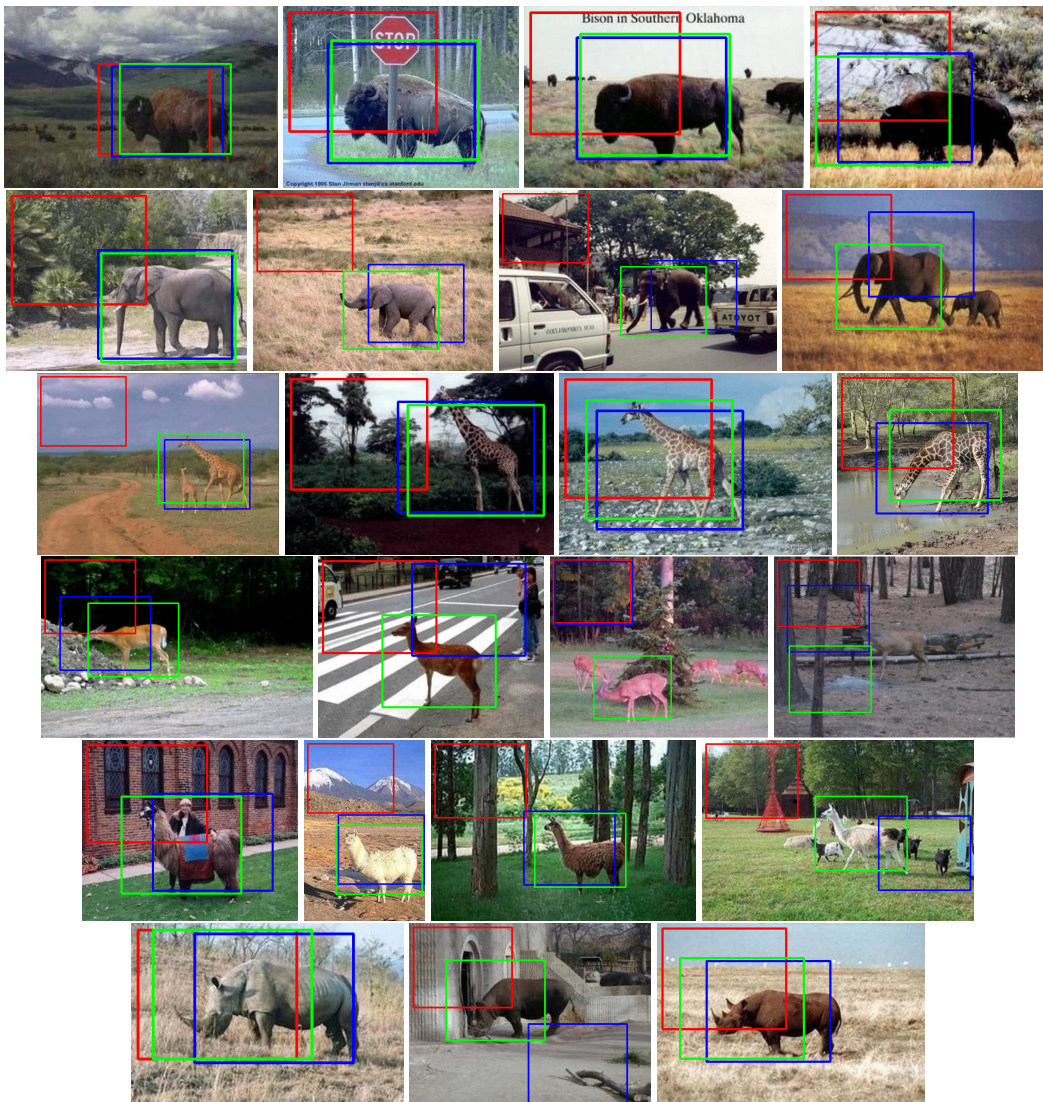

Figure 3. Example training images from the mammals dataset, shown with final imputed latent object locations by three algorithms: CCCP (red), G-MM random (blue), G-MM biased (green). Initialization: *top-left*.
